# Supplementary material for: Pore Structure and Properties of PEEK Hollow Fiber Membranes: Influence of the Phase Structure Evolution of PEEK/PEI Composite
Source: MDPI journal article supplement (doi:10.3390/polym11091398), 2019-08-26
Supplement: s1 [file s1]

**Table S1.** Mass loss rate of the fibers with different extraction times.

| extraction time (h) | Pre-extraction mass (g) | After extraction mass (g) | Mass loss rate (%) |
|---------------------|-------------------------|---------------------------|--------------------|
| 3                   | 0.362                   | 0.172                     | 52.5               |
| 6                   |                         | 0.165                     | 54.4               |
| 9                   |                         | 0.160                     | 55.8               |
| 12                  |                         | 0.162                     | 55.3               |
| 24                  |                         | 0.159                     | 56.0               |

<sup>1</sup>When PEI is completely extracted, the theoretical mass loss rate is 60%.

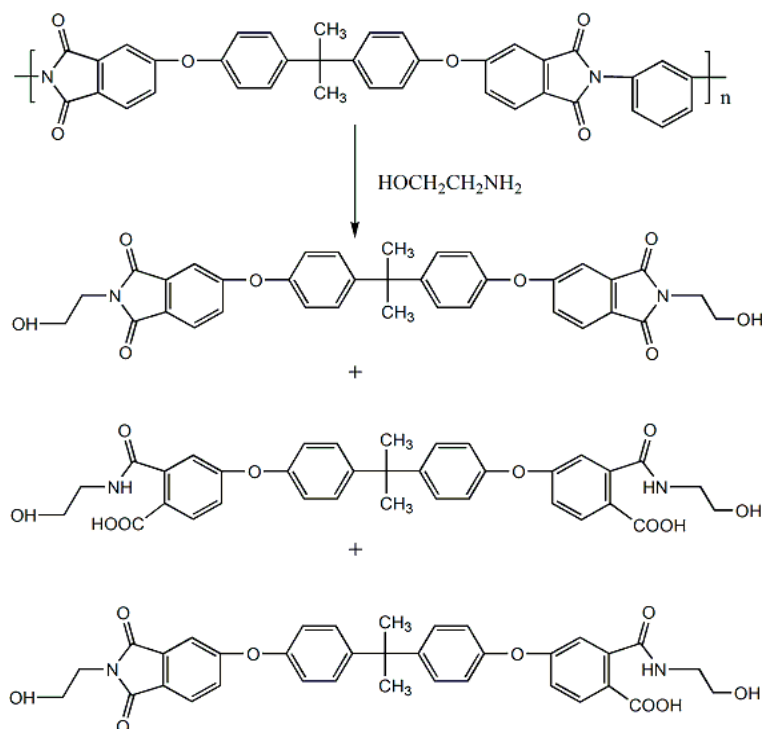

**Figure S1.** Decomposition reaction mechanism of PEI in the extraction solution.

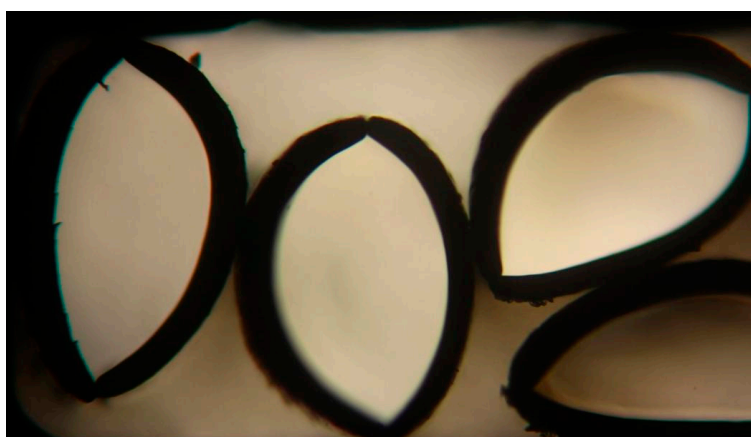

**Figure S2.** The cross-section of PEEK/PEI hollow fiber by optical microscope (100×).
